# Supplementary material for: Isomerization-induced fluorescence enhancement of two new viologen derivatives: mechanism insight and DFT calculations
Source: Royal Society of Chemistry journal article supplement (doi:10.1039/d3sc02051g), 2023-01-01
Supplement: d3sc02051g1.pdf [file d3sc02051g1.pdf]

## Supporting Information

### Isomerization-induced Fluorescence Enhancement of Two New Viologen Derivatives: Mechanism Insight and DFT calculation

Xiuping Yin,<sup>1</sup> Xinxing Li,<sup>1,2</sup> Xuyi Li,<sup>1</sup> Malgorzata Biczysko,<sup>\*,1,2</sup> Shourong Zhu,<sup>1</sup>  
Jiaqiang Xu<sup>1</sup> and Yue-Ling Bai<sup>\*,1</sup>

<sup>1</sup>College of Science, Shanghai University, 99 Shangda Road, Shanghai 200444, China

<sup>2</sup>International Center for Quantum and Molecular Structures, Department of physics, College of Science,  
Shanghai University, 99 Shangda Road, Shanghai 200444, China

#### CONTENTS

|                                                                                                            |         |
|------------------------------------------------------------------------------------------------------------|---------|
| 1. <sup>1</sup> H NMR, <sup>13</sup> C NMR and FT-IR spectra curve of <b>Vio1·2Cl (FigureS1-S3)</b> ,..... | p2-4    |
| 2. <sup>1</sup> H NMR, <sup>13</sup> C NMR and FT-IR spectra curve of <b>Vio2·2Br (FigureS4-S6)</b> ,..... | p5-7    |
| 3. Crystallographic data of <b>Vio1·2Cl</b> and <b>Vio2·2Br (FigureS7, Table S1)</b> ,.....                | p8-9    |
| 4. Photographic images of <b>Vio2·2Br (FigureS8)</b> ,.....                                                | p10     |
| 5. UV-vis spectral and <b>Vio1·2Cl</b> and <b>Vio2·2Br (FigureS9-S10)</b> ,.....                           | p11-12  |
| 6. EPR of <b>Vio1·2Cl (Figure S11)</b> ,.....                                                              | p13     |
| 7. Fluorescence properties of <b>Vio1·2Cl</b> and <b>Vio2·2Br (FigureS12-S14, Table S2-S3)</b> ,.....      | p14-p18 |
| 8. Mass spectra of <b>Vio2·2Br (FigureS15, Table S4)</b> ,.....                                            | p19-20  |
| 9. The FTIR spectrum of <b>Vio1·2Cl (a)</b> and <b>Vio1·2Cl (b)</b> in EtOH ( <b>FigureS16</b> ),.....     | p21     |
| 10. DFT and TD-DFT Calculations ( <b>FigureS17-S19, Table S5-S7</b> ),.....                                | p22-27  |
| 11. The solvatochromism and photoluminescence of <b>Vio1·2Cl (Figure S20)</b> ,.....                       | p28     |
| 12. Photographs of the test paper sensing experiment ( <b>Figure S21</b> ),.....                           | p29     |

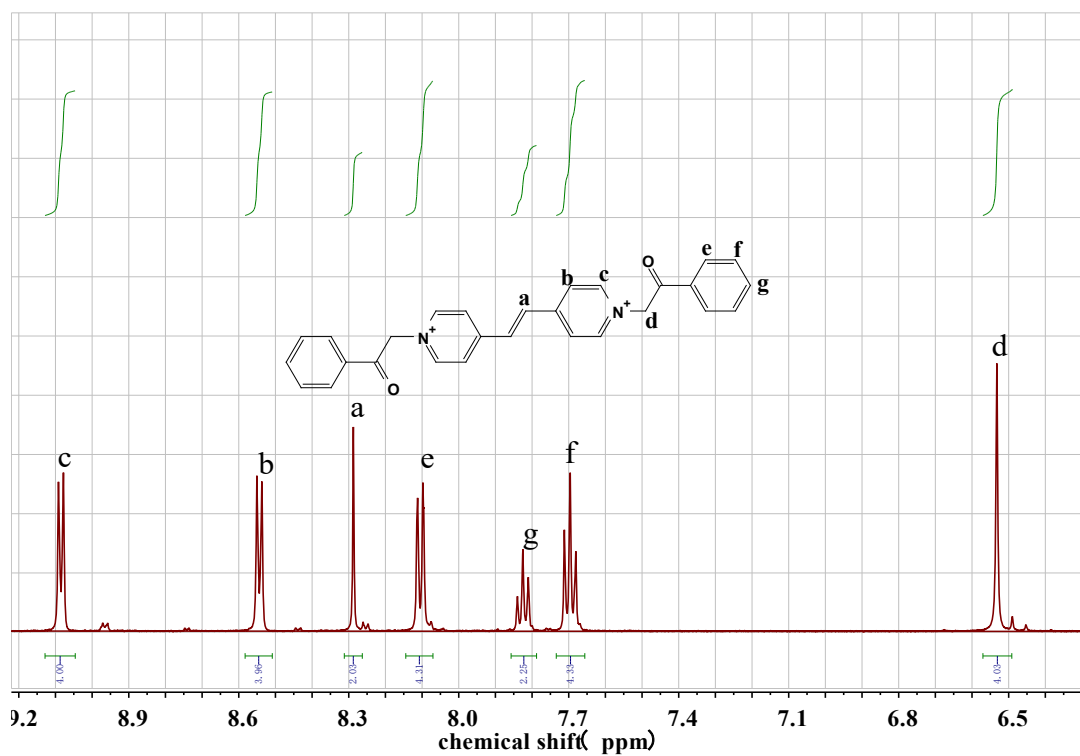

**Figure S1.** <sup>1</sup>H NMR of synthesized Vi01-2Cl powder in deuterated *d*-DMSO.

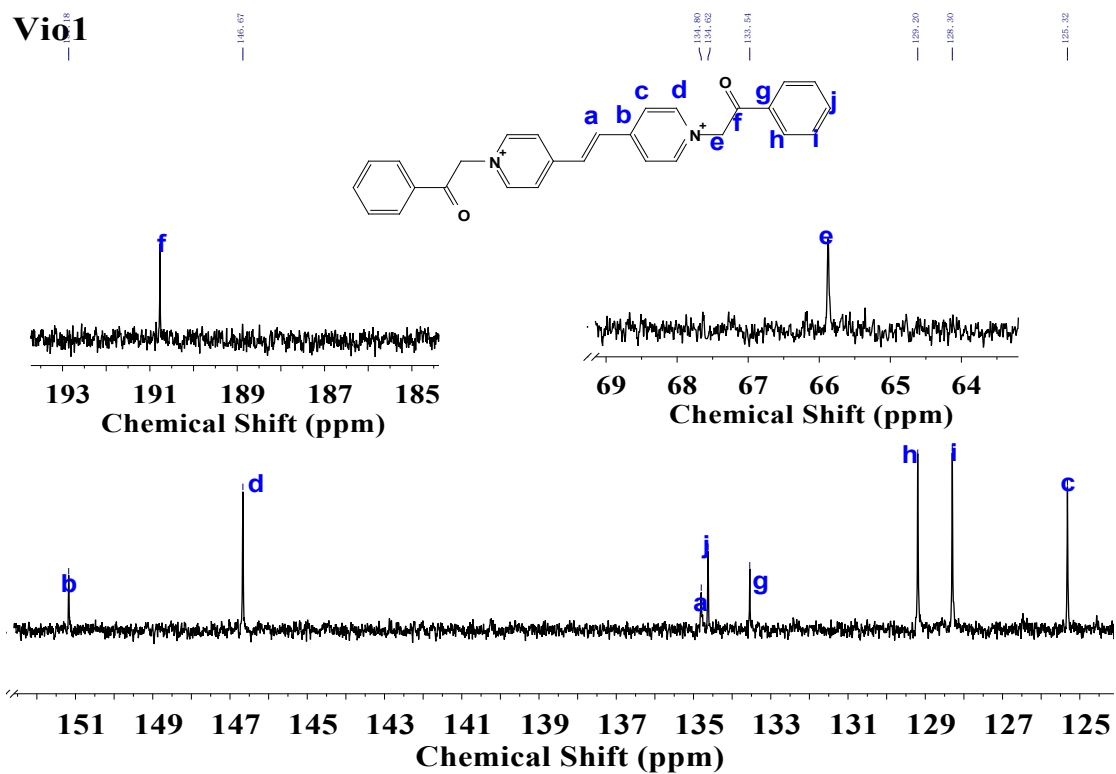

**Figure S2.**  $^{13}\text{C}$  NMR of synthesized Vio1·2Cl powder in deuterated *d*-DMSO.

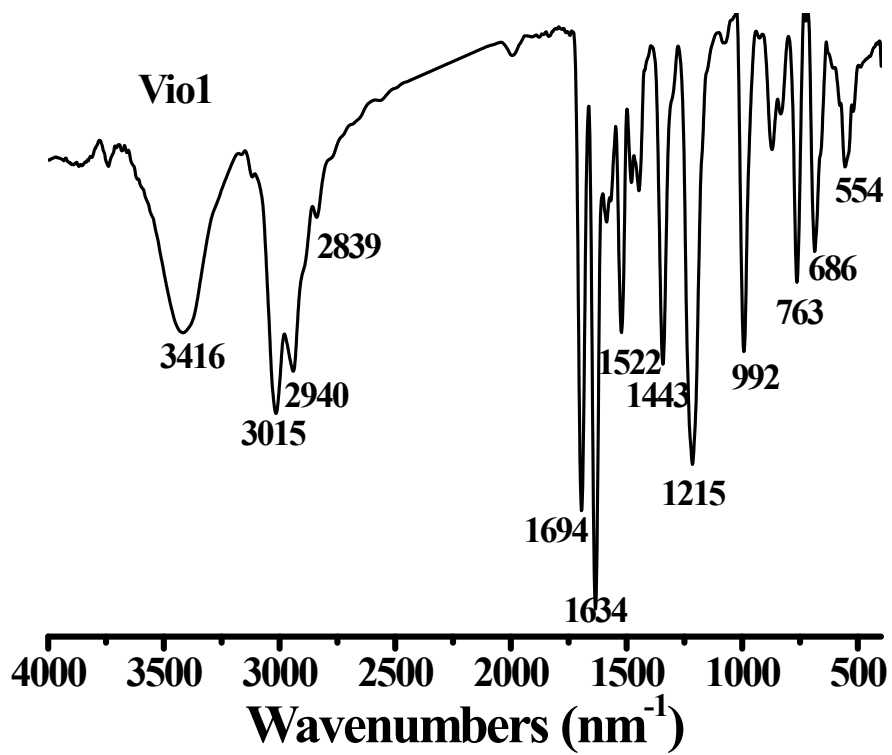

Figure S3. IR spectra of Vio1·2Cl (KBr disc).

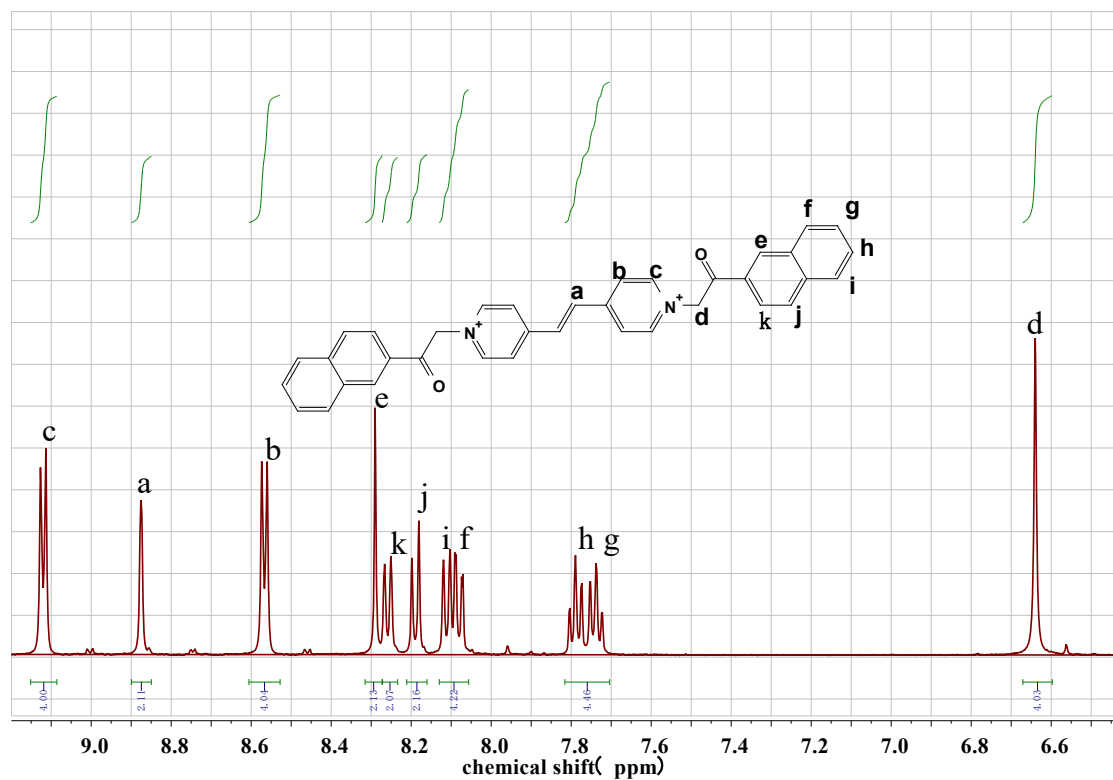

**Figure S4.**  $^1\text{H}$  NMR of synthesized Vio2·2Br powder in deuterated  $d$ -DMSO.

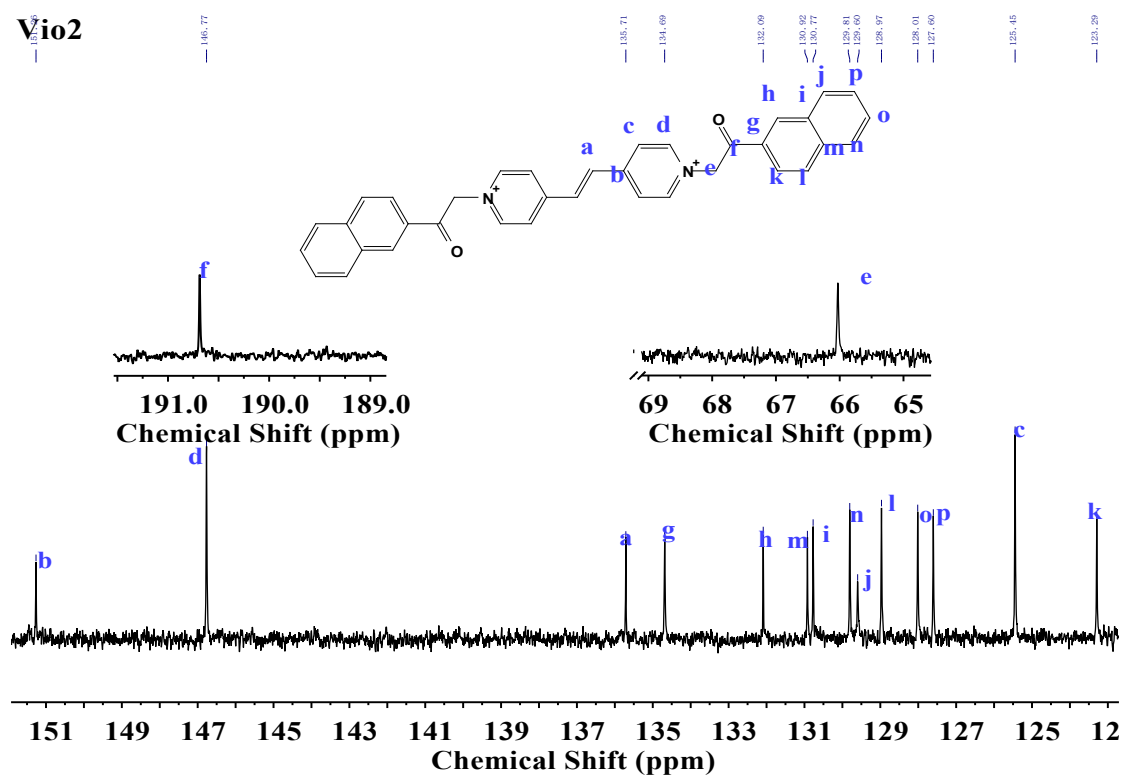

**Figure S5.**  $^{13}\text{C}$  NMR of synthesized Vio2·2Br powder in deuterated *d*-DMSO.

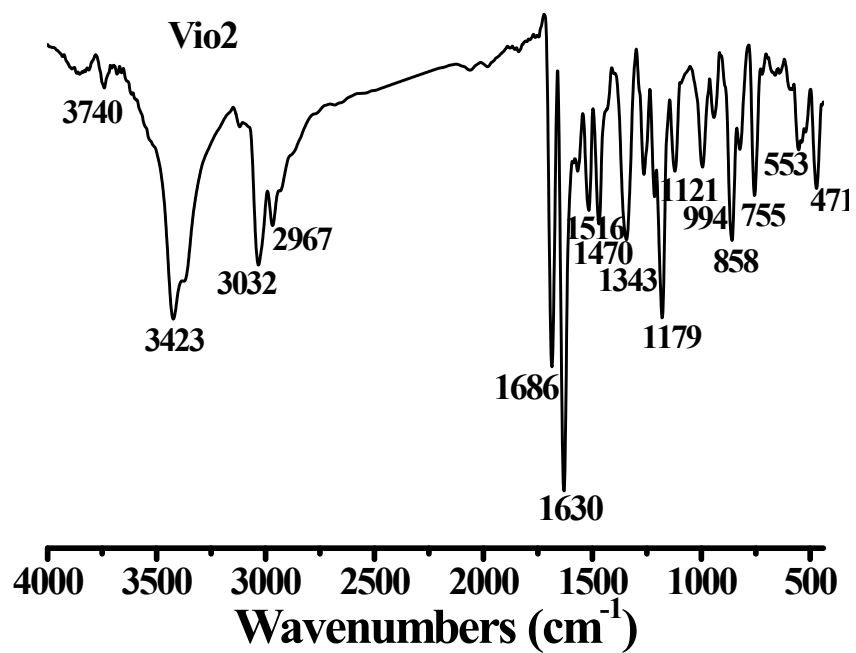

Figure S6. IR spectra of Vio2·2Br (KBr dis

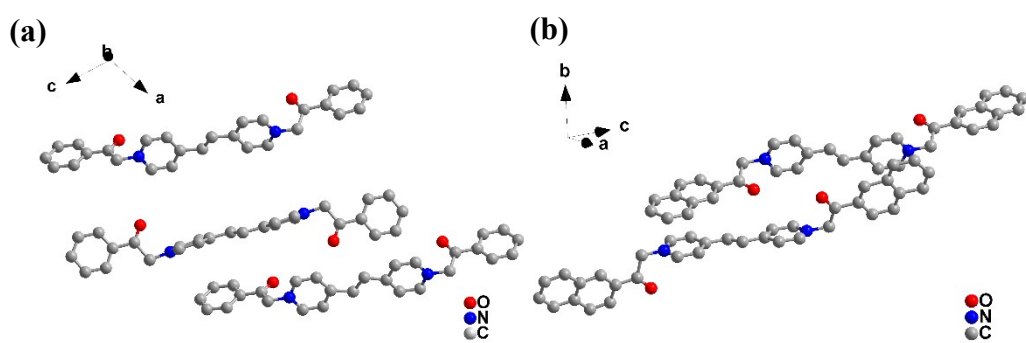

**Figure S7.** The crystal structure of **Vio1<sup>2+</sup>** (a) and **Vio2<sup>2+</sup>** (b).



**Table S1. The crystallographic data of Vio1·2Cl and Vio2·2Br.**

| Compound                                       | Vio1·2Cl                                                                      | Vio2·2Br                                                                      |
|------------------------------------------------|-------------------------------------------------------------------------------|-------------------------------------------------------------------------------|
| Molecular formula                              | C <sub>28</sub> H <sub>24</sub> N <sub>2</sub> O <sub>2</sub> Cl <sub>2</sub> | C <sub>36</sub> H <sub>28</sub> N <sub>2</sub> O <sub>2</sub> Br <sub>2</sub> |
| Molecular weight                               | 491.39                                                                        | 680.42                                                                        |
| Crystal system                                 | Monoclinic                                                                    | Monoclinic                                                                    |
| Space group                                    | P 2 <sub>1</sub> /c                                                           | P 2 <sub>1</sub> /c                                                           |
| <i>a</i> /(Å)                                  | 26.4051(17)                                                                   | 14.4466(3)                                                                    |
| <i>b</i> /(Å)                                  | 11.7620(6)                                                                    | 18.0374(3)                                                                    |
| <i>c</i> /(Å)                                  | 28.6519(12)                                                                   | 17.9239(3)                                                                    |
| $\alpha$ (°)                                   | 90                                                                            | 90                                                                            |
| $\beta$ (°)                                    | 110.083(2)                                                                    | 98.9830(1)                                                                    |
| $\gamma$ (°)                                   | 90                                                                            | 90                                                                            |
| <i>V</i> /Å <sup>3</sup>                       | 8357.6(8)                                                                     | 4613.31(15)                                                                   |
| <i>Z</i>                                       | 12                                                                            | 6                                                                             |
| <i>D<sub>c</sub></i> /mg·m <sup>-3</sup>       | 1.172                                                                         | 1.469                                                                         |
| $\mu$ /mm <sup>-1</sup>                        | 1.514                                                                         | 2.483                                                                         |
| <i>R</i> (int)                                 | 0.0000                                                                        | 0.0756                                                                        |
| <i>F</i> (000)                                 | 3072                                                                          | 2064                                                                          |
| <i>R</i> <sub>1</sub> , <i>wR</i> <sub>2</sub> | <i>R</i> <sub>1</sub> = 0.0937<br><i>wR</i> <sub>2</sub> = 0.2534             | <i>R</i> <sub>1</sub> = 0.0664<br><i>wR</i> <sub>2</sub> = 0.1937             |
| GOF on <i>F</i> <sup>2</sup>                   | 1.070                                                                         | 1.051                                                                         |
| CCDC                                           | 2218985                                                                       | 2218984                                                                       |

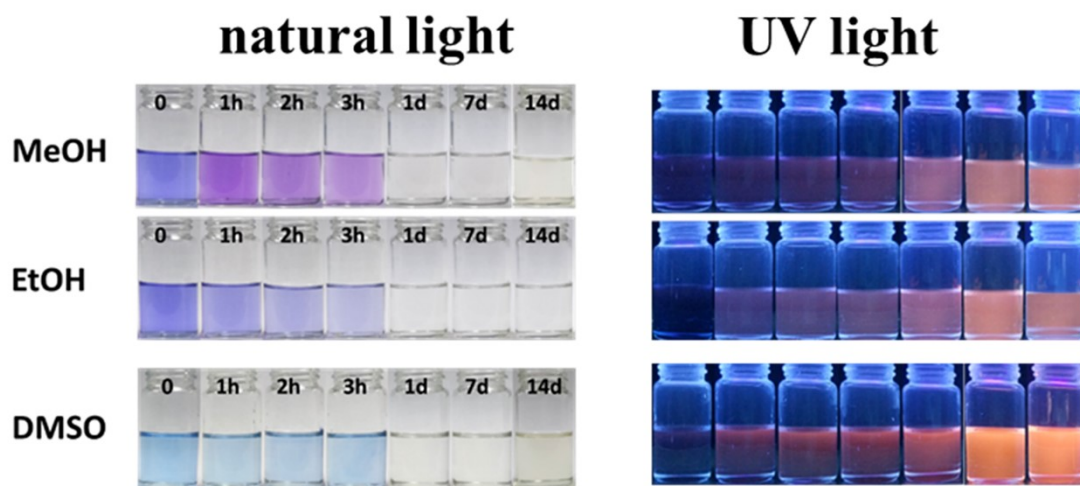

**Figure S8.** Photographic images of **Vio2·2Br** ( $2.0 \times 10^{-4}$  M) in different solvents at different time (left: under natural light, right: under 365 nm UV lamp).

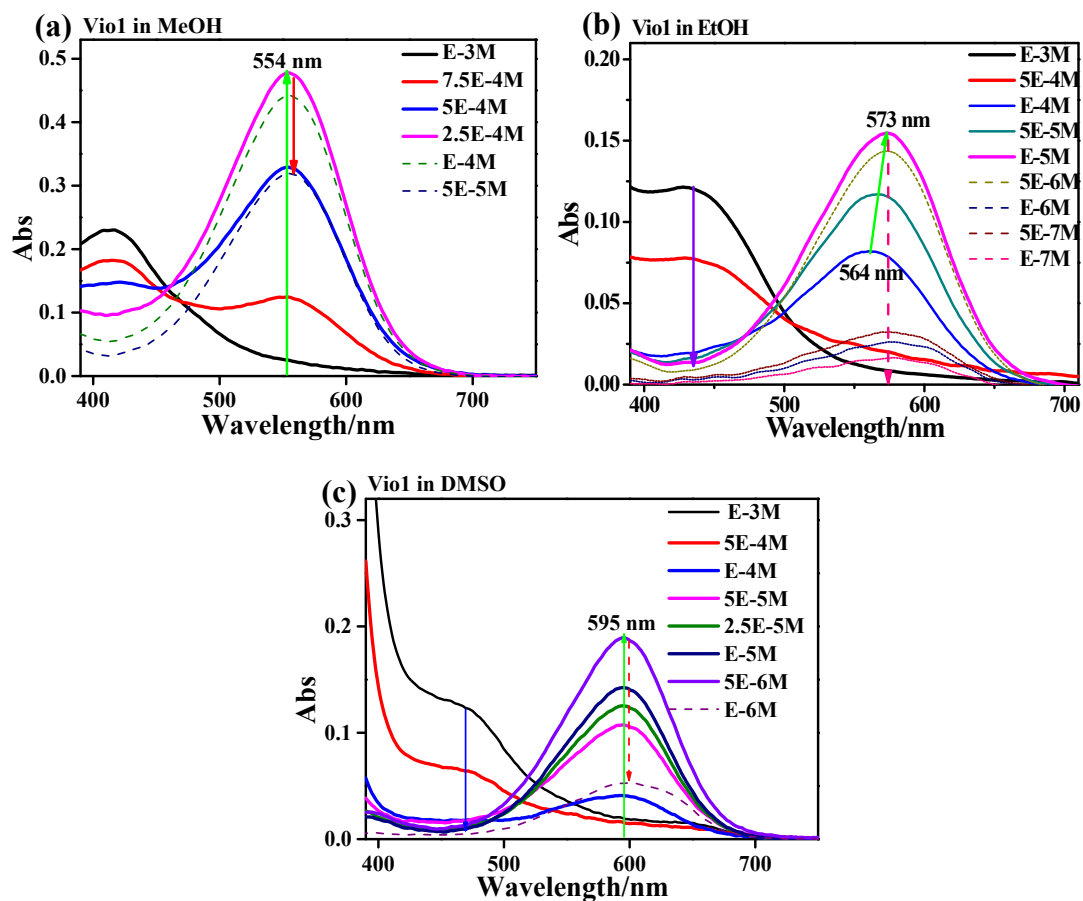

**Figure S9.** UV-vis spectra of **Vio1·2Cl** in different solvents at different concentration: (a) MeOH, (b) EtOH, (c) DMSO.

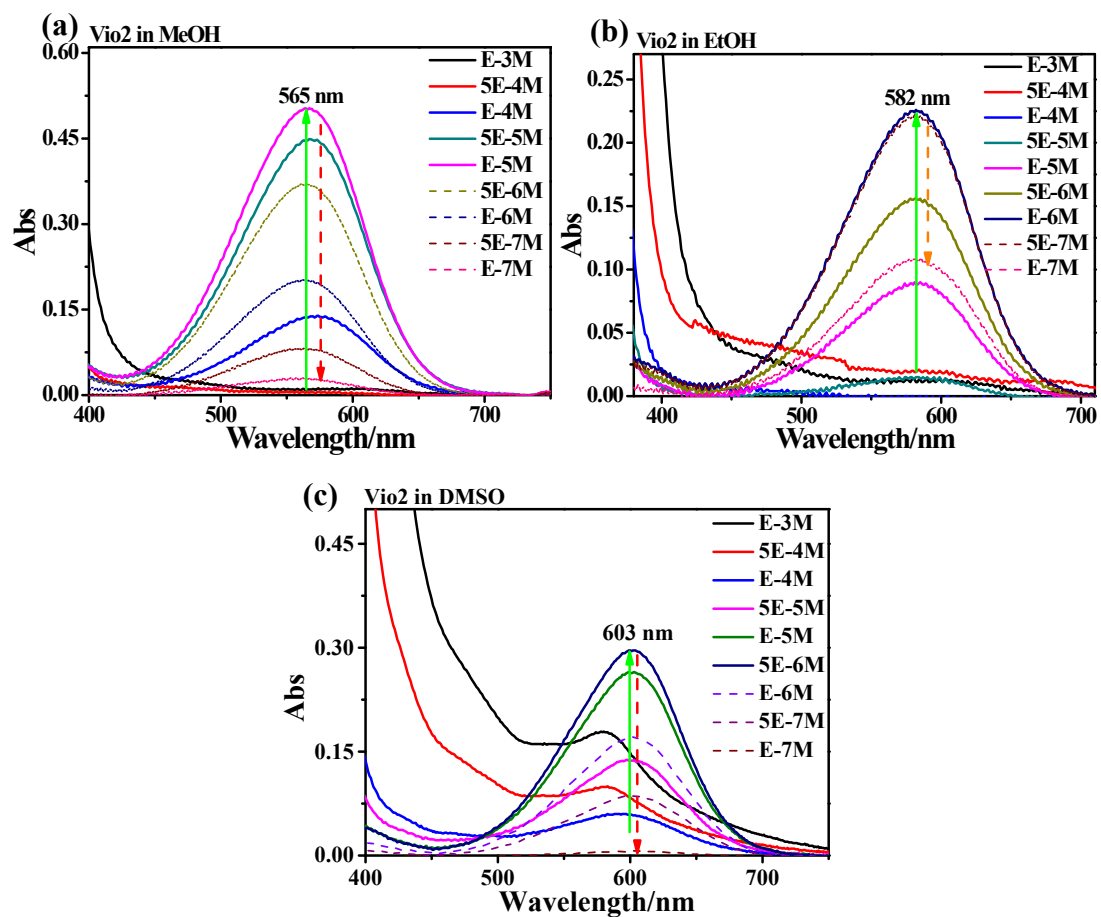

**Figure S10.** UV-vis spectra of **Vio2·2Br** in different solvents at different concentration: (a) MeOH, (b) EtOH, (c) DMSO.

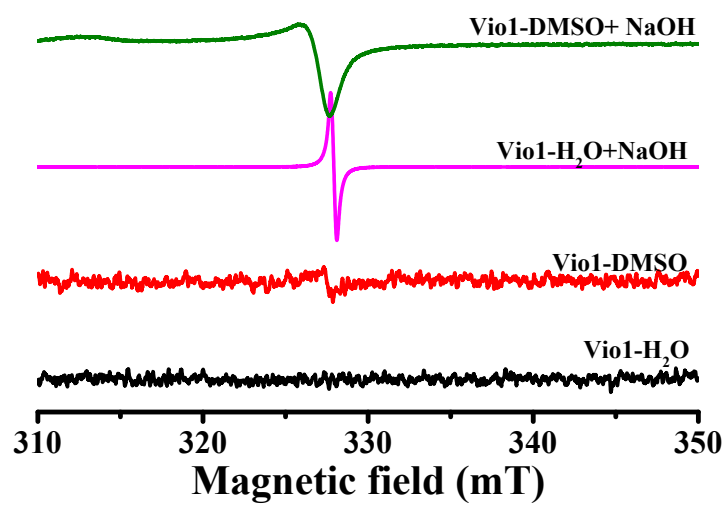

**Figure S11.** EPR spectra of **Vio1·2Cl** in H<sub>2</sub>O and DMSO solutions.

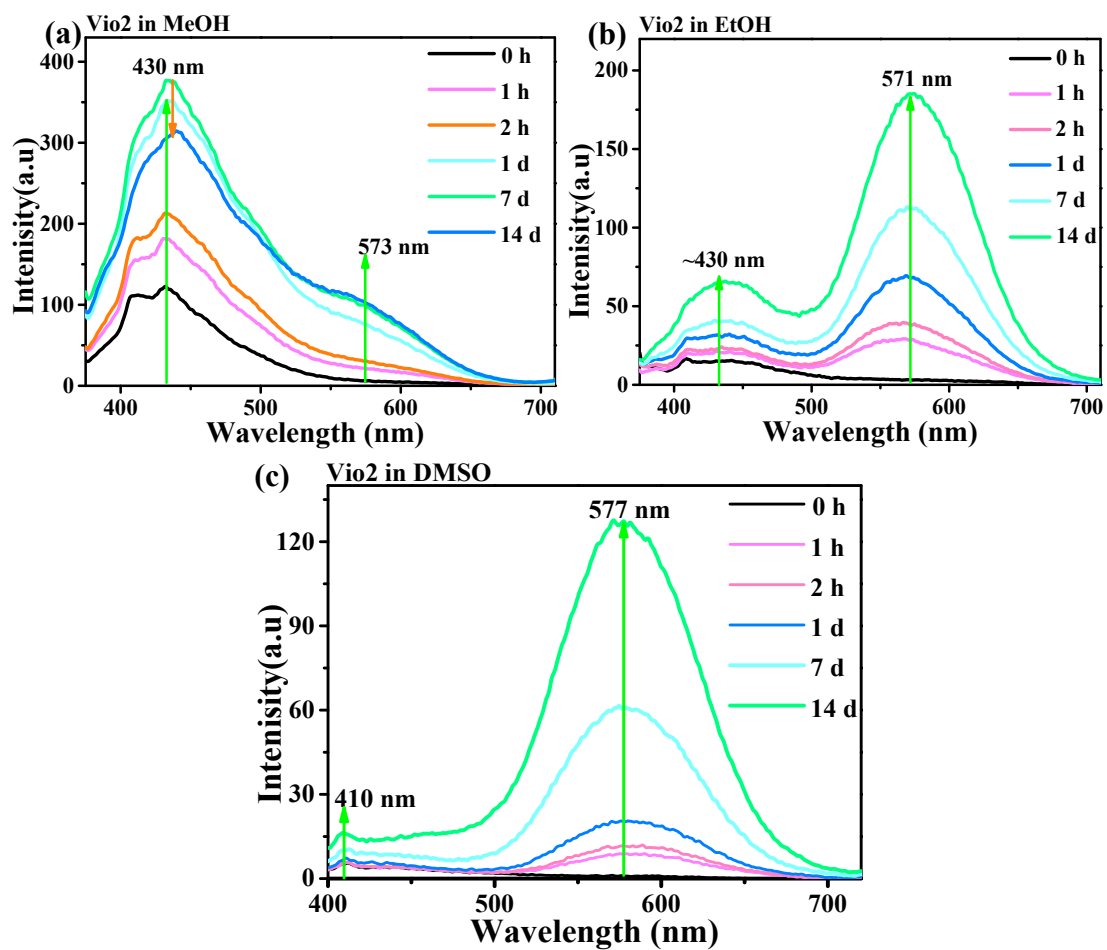

**Figure S12.** Fluorescence spectra of Vio2·2Br ( $2.0 \times 10^{-4}$  M) in different solvents at different time: (a) MeOH, (b) EtOH, (c) DMSO.

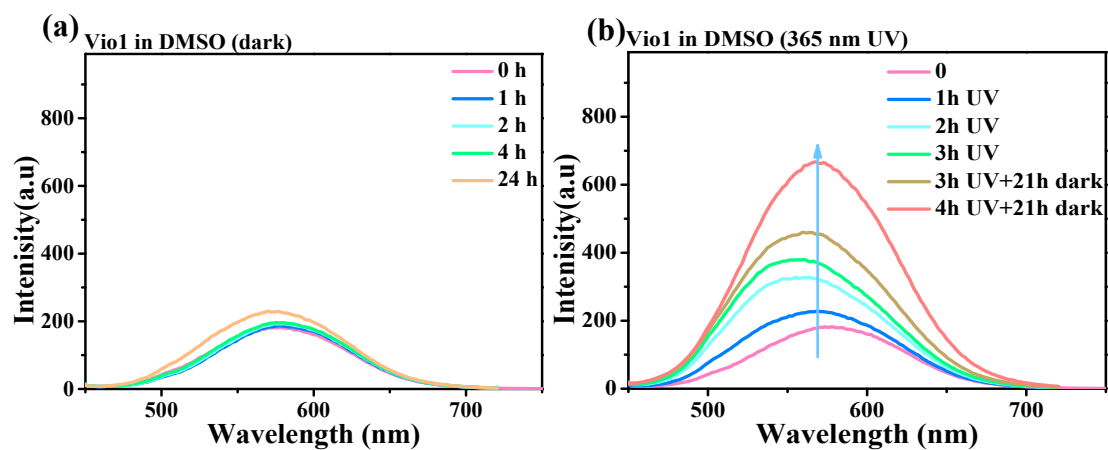

**Figure S13.** The Fluorescence spectra of Vio1·2Cl (0.2 mmol/L) in DMSO solution under the dark (a) and under the UV light irradiation (b).

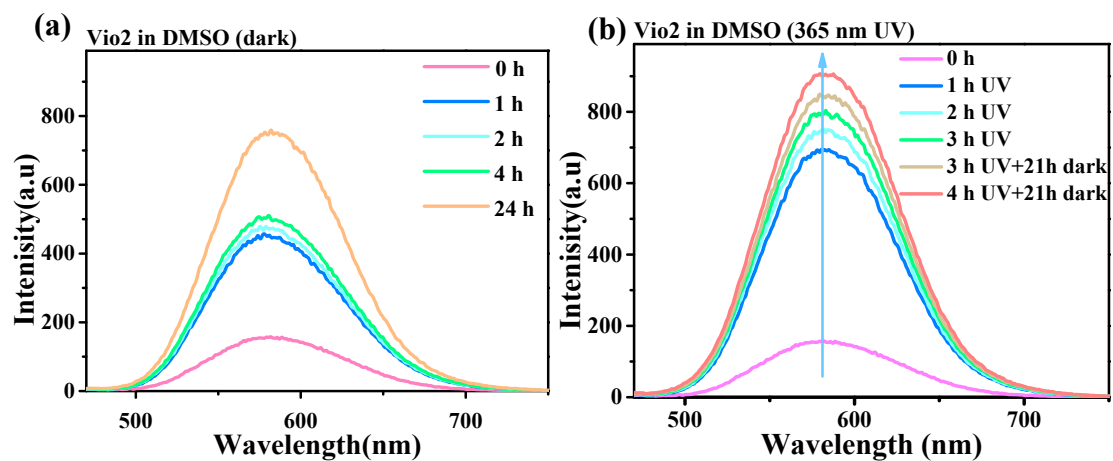

**Figure S14.** The Fluorescence spectra of **Vio2·2Br** (0.2 mmol/L) in DMSO solution under the dark (a) and under the UV light irradiation (b).



**Table S2.** The characteristic peak data of UV-vis spectrum and fluorescence spectrum in different solvents

|               |                          | <b>H<sub>2</sub>O</b> | <b>MeOH</b> | <b>EtOH</b>    | <b>DMSO</b> |
|---------------|--------------------------|-----------------------|-------------|----------------|-------------|
| <b>UV-vis</b> | <b>Vio1<sup>2+</sup></b> | -                     | 554 nm      | 564~573 nm     | 595 nm      |
|               | <b>Vio2<sup>2+</sup></b> | -                     | 565 nm      | 582 nm         | 603 nm      |
| <b>PL</b>     | <b>Vio1<sup>2+</sup></b> | 430,530 nm            | 430,520 nm  | 433,570~530 nm | 410,577 nm  |
|               | <b>Vio2<sup>2+</sup></b> | -                     | 430,573 nm  | ~430,571 nm    | 410,577 nm  |

**Table S3.** Absorption maxima, emission maxima, and Stokes shifts of **Vio1<sup>2+</sup>** and **Vio2<sup>2+</sup>** in different solvent.

|                          | <b>Solvent</b> | $\lambda_{\text{abs}}$<br><b>(max)</b> | $\lambda_{\text{em}}$<br><b>(max)</b> | <b>Stokes</b><br><b>(nm)</b> |
|--------------------------|----------------|----------------------------------------|---------------------------------------|------------------------------|
| <b>Vio1<sup>2+</sup></b> | <b>MeOH</b>    | 430                                    | 520                                   | 90                           |
|                          | <b>EtOH</b>    | 420                                    | 530                                   | 110                          |
|                          | <b>DMSO</b>    | 440                                    | 577                                   | 137                          |
| <b>Vio2<sup>2+</sup></b> | <b>MeOH</b>    | 361                                    | 430                                   | 69                           |
|                          | <b>EtOH</b>    | 368                                    | 430                                   | 62                           |
|                          | <b>DMSO</b>    | 460                                    | 577                                   | 117                          |

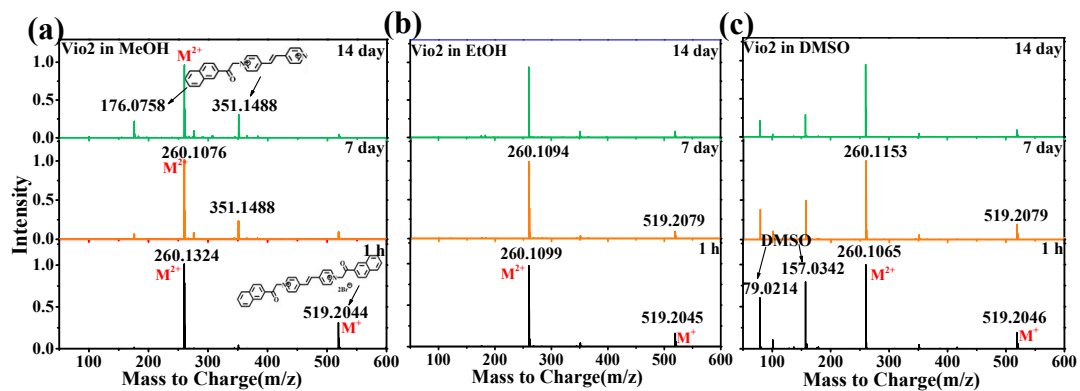

**Figure S15.** Mass spectra of of **Vio2·2Br** in different solvents at different time: (a) MeOH, (b) EtOH, (c) DMSO.

**Table S4.** Relative ion abundance of  $M^{2+}/2$  in different solvents at 1h, 7 and 14 days from ESI-MS data.

|          | Solvent          | 1 h | 7 day | 14 day |
|----------|------------------|-----|-------|--------|
| Vio1·2Cl | H <sub>2</sub> O | 1   | 0.791 | 0.523  |
|          | MeOH             | 1   | 0.928 | 0.675  |
|          | DMSO             | 1   | 0.924 | 0.824  |
| Vio2·2Br | MeOH             | 1   | 1     | 0.964  |
|          | EtOH             | 1   | 1     | 0.965  |
|          | DMSO             | 1   | 0.998 | 0.951  |

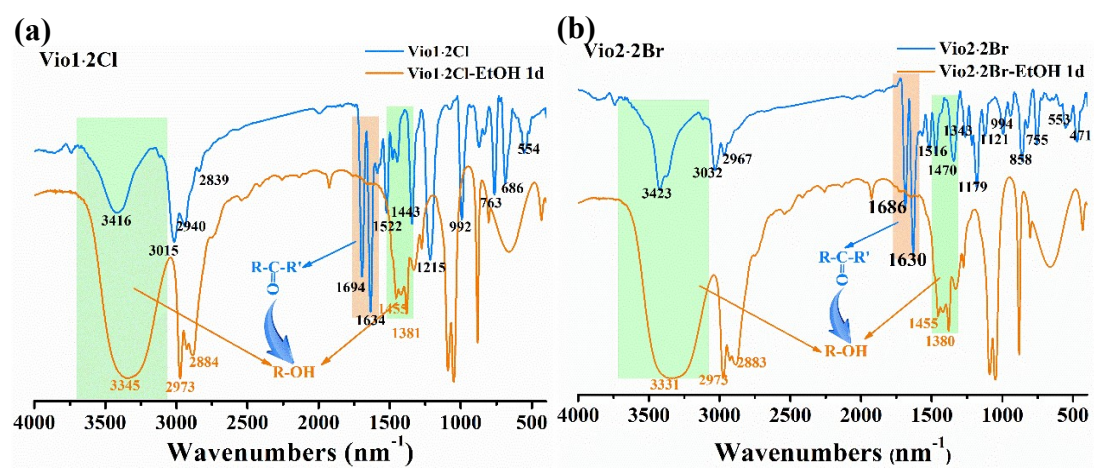

**Figure S16.** The FTIR spectrum of **Vio1<sup>2+</sup>** (a) and **Vio2<sup>2+</sup>** (b) in EtOH at initial state and after 1 d.

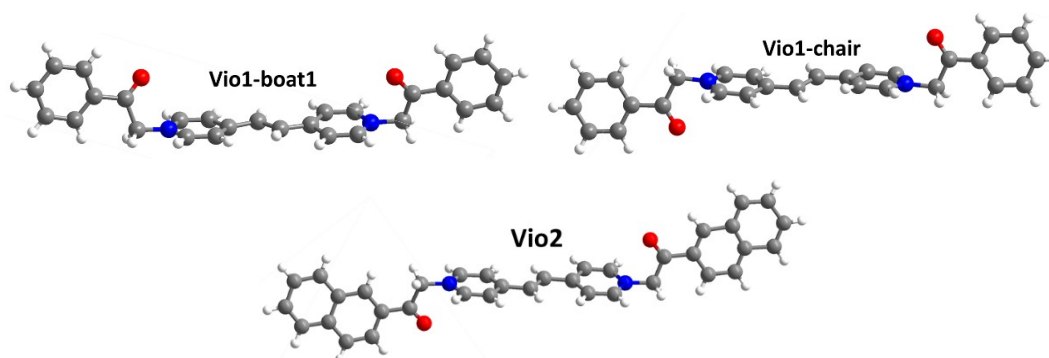

**Figure S17.** The molecular structure of the crystal of **Vio1**<sup>2+</sup> and **Vio2**<sup>2+</sup> (To study the spectral properties of molecules, the first step is to optimize the geometric configuration of the molecules. The molecular structure model was constructed according to the crystal cif file. Since the initial molecular model may not have the lowest energy, it is necessary to optimize its structure by software so that its energy reaches a minimum value, and the geometry is stable to do the following research).

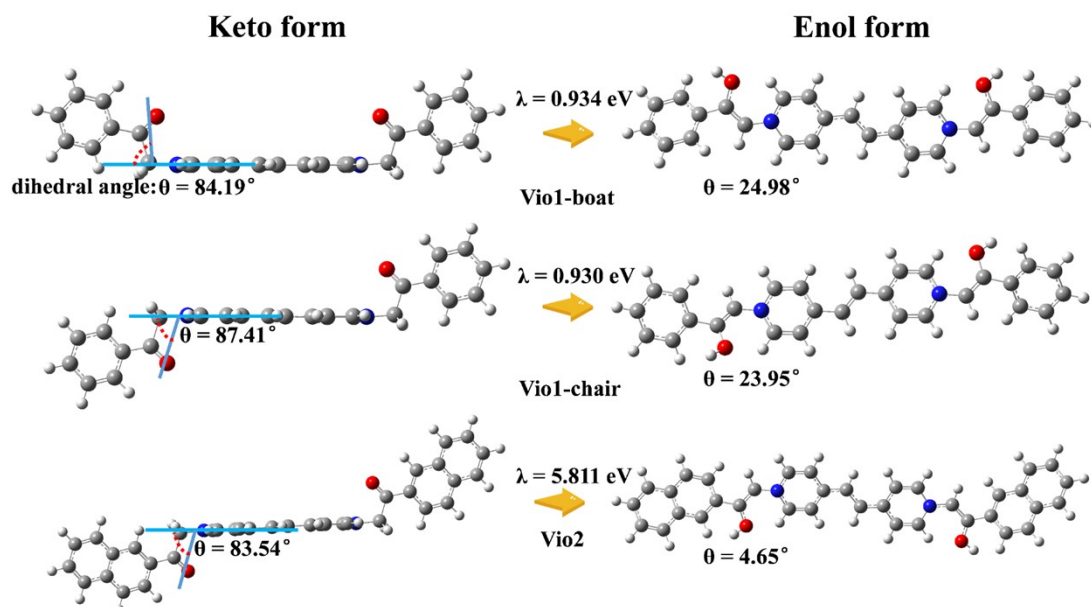

**Figure S18.** Ground state optimized structures for **Vio1<sup>2+</sup>** and **Vio2<sup>2+</sup>** at CAM-B3LYP/PCM (DMSO) level of theory (There are two kinds of configuration in the structural unit of **Vio1<sup>2+</sup>** crystal: boat and chair configuration. **Vio2<sup>2+</sup>** has only one configuration of chair. The structure of the two ship types in **Vio1<sup>2+</sup>** is the same, so only one of them should be selected for calculation. The CAM-B3LYP functional has been chosen to calculation of the optimized ground state structure of ketone and enolic type).

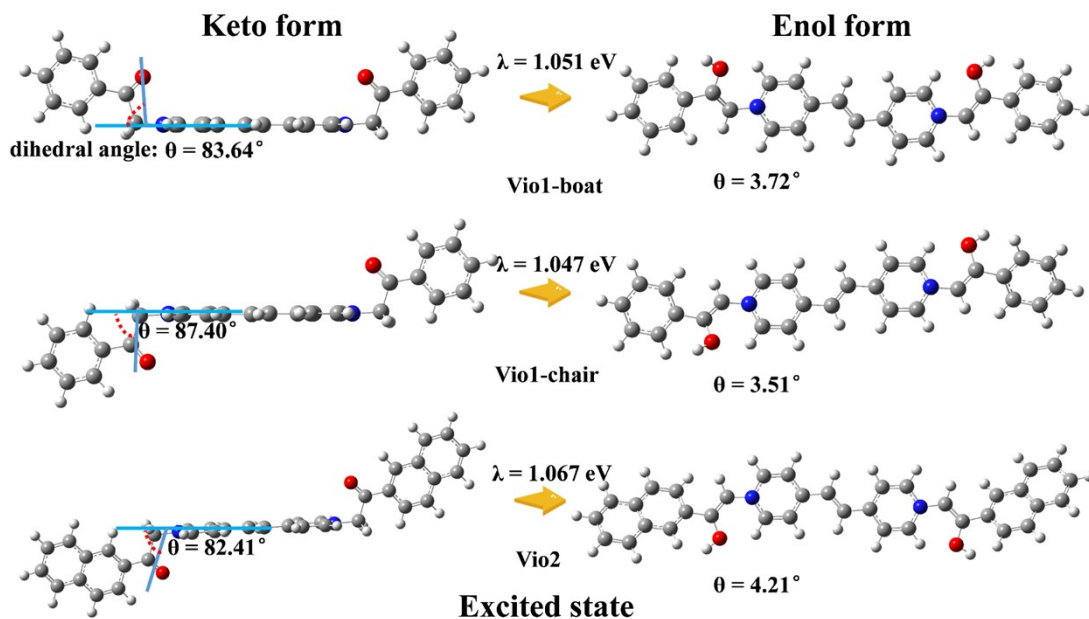

**Figure S19.** Excited state optimized structures for **Vio1<sup>2+</sup>** and **Vio2<sup>2+</sup>** at CAM-B3LYP/PCM (DMSO) level of theory (There are two kinds of configuration in the structural unit of **Vio1<sup>2+</sup>** crystal: boat and chair configuration. **Vio2<sup>2+</sup>** has only one configuration of chair. The structure of the two ship types in **Vio1<sup>2+</sup>** is the same, so only one of them should be selected for calculation. The CAM-B3LYP functional has been chosen to calculation of the optimized ground state structure of ketone and enolic type).



**Table S5.** Relative energies (and Gibbs free energies) in the ground state ( $S_0$ ) structures optimized at B3LYP-D3/SNSD/PCM level.

|                                     | Vio1boat-<br>keto | Vio1boat-<br>enol | Vio1chair-<br>keto | Vio1chair-<br>enol | Vio2-keto | Vio2 enol |
|-------------------------------------|-------------------|-------------------|--------------------|--------------------|-----------|-----------|
| <b>Energy<br/>(hartree)</b>         | -1341.32          | -1341.29          | -1341.32           | -1341.29           | -1648.67  | -1648.46  |
| <b><math>\Delta</math> (eV)</b>     | 0.934             |                   | 0.930              |                    | 5.811     |           |
| <b><math>\Delta</math> (kJ/mol)</b> | 90.047            |                   | 89.70              |                    | 560.680   |           |

**Table S6.** Selected structural parameters of **Vio1·2Cl** and **Vio2·2Br** (keto and enol) in the ground and excited electronic states and the difference of dihedral angles of the ground state (or excited state) of different structures (keto and enol).

| Dihedral angle                   | Vio1boat        | Vio1boat-enol | Vio1chair        | Vio1chair-enol | Vio2          | Vio2-enol |
|----------------------------------|-----------------|---------------|------------------|----------------|---------------|-----------|
| Ground state (degrees)           | 84.19           | 24.98         | 87.41            | 23.95          | 83.54         | 4.65      |
| Excited state (degrees)          | 83.64           | 3.72          | 87.40            | 3.51           | 82.41         | 4.21      |
| $\Delta\theta$                   | 0.55            | 21.26         | 0.01             | 20.44          | 0.1           | 0.44      |
| Ground state ( $\Delta\theta$ )  | <b>Vio1boat</b> | 59.21         | <b>Vio1chair</b> | 63.46          | <b>Vio2 (</b> | 78.89     |
| Excited state ( $\Delta\theta$ ) | <b>(k-e)</b>    | 79.92         | <b>(k-e)</b>     | 83.89          | <b>k-e)</b>   | 78.2      |

**Table S7.** Emission wavelengths and relative oscillator strengths for **Vio1·2Cl** and **Vio2·2Br** calculated at TD-CAM-B3LYP/SNSD level.

|             |                                | <b>Vio1-boat</b> | <b>Vio1-boat-</b> | <b>Vio1-chair</b> | <b>Vio1-chair</b> | <b>Vio2</b> | <b>Vio2-enol</b> |
|-------------|--------------------------------|------------------|-------------------|-------------------|-------------------|-------------|------------------|
|             |                                | <b>enol</b>      |                   | <b>-enol</b>      |                   |             |                  |
|             | <b>E/eV</b>                    | 2.98             | 2.20              | 2.98              | 2.20              | 2.98        | 2.13             |
| <b>DMSO</b> | <b><math>\lambda</math>/nm</b> | 417              | 564               | 416               | 563               | 417         | 582              |
|             | <b>f</b>                       | 1.53             | 2.58              | 1.53              | 2.65              | 1.62        | 2.81             |

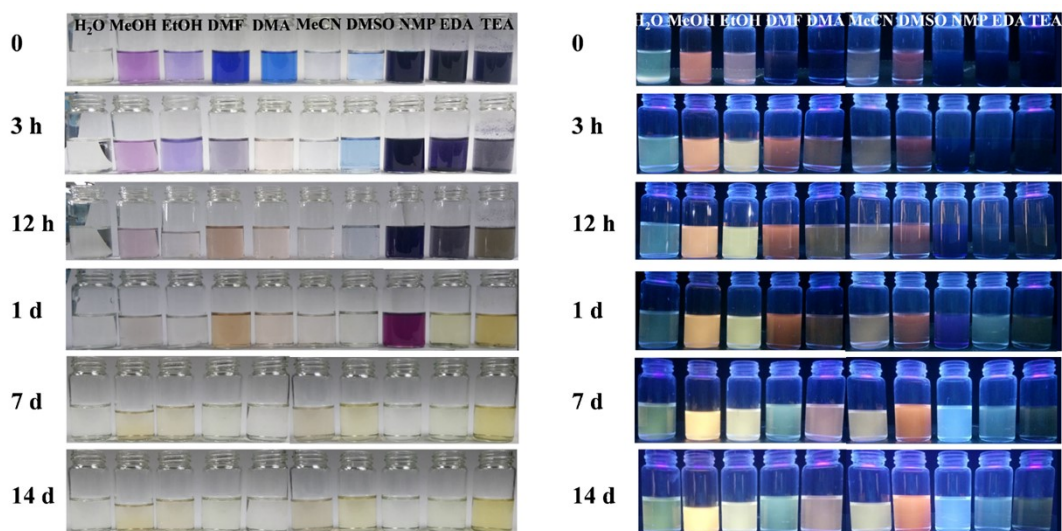

**Figure S20.** The solvatochromism (Left) and photoluminescence (Right) of **Vio1·2Cl** ( $2 \times 10^{-4}$  M) in different solvents with increasing time (solvents left to right: H<sub>2</sub>O, MeOH (Methanol), EtOH (Ethanol), DMF (N, N-Dimethylformamide), DMA (N, N-Dimethylacetamide), MeCN (Acetonitrile), DMSO (Dimethyl sulfoxide), NMP (N-methyl-2-pyrrolidone), EDA (Ethylenediamine), and TEA (Triethylamine)).

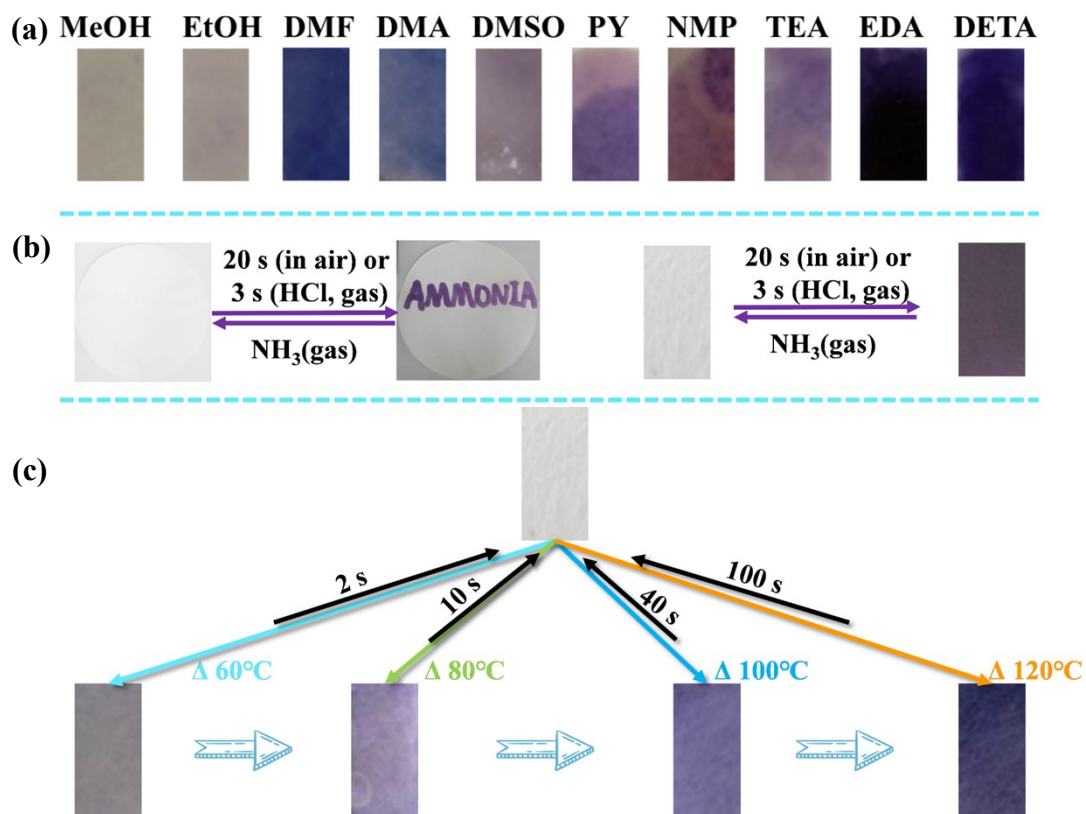

**Figure S21.** (a) Photographs of the **Vio1·2Cl** impregnated test papers after treatment with different organic solvent. (b) Photographs of the **Vio1·2Cl** impregnated test papers after treatment with  $\text{NH}_3$  and  $\text{HCl}$ . (c) Photographs of the **Vio1·2Cl** impregnated test papers after treatment with different temperature.
